# Supplementary material
Source: publisher site journal article supplement (https://www.dovepress.com/article/563908)
Supplement: Supplementary file 1 [file 563908_Revised%20Supplementary%20Figure.docx]

**Suppl. Figure**  Individual values for Timed Up and Go Test (above) and Chair-Rising Test (below) before and after TAVI

**standard practice**

Before TAVI

**Before TAVI**

**Before TAVI**

**After TAVI**

**After TAVI**

**After TAVI**

**Before TAVI**

**After TAVI**

**Before TAVI**
